# Supplementary material
Source: publisher figshare collection journal article supplement (https://acs.figshare.com/ndownloader/files/14140262)
Supplement: Supplementary file 1 [file 14140262]

**Perfluoroalkyl acids (PFAAs)**  
**concentrations and oxidative status in two generations of great tits inhabiting a**  
**contamination hotspot**

Ana Lopez-Antia<sup>a\*†</sup>, Thimo Groffen<sup>b†</sup>, Robin Lasters<sup>b</sup>, Hamada AbdElgawad<sup>c,d</sup>, Jiachen Sun<sup>a</sup>,  
Han Asard<sup>c</sup>, Lieven Bervoets<sup>b</sup>, Marcel Eens<sup>a</sup>

<sup>a</sup>Behavioural Ecology and Ecophysiology Group (BECO), Department of Biology, University of Antwerp, Universiteitsplein 1, 2610 Wilrijk, Belgium.

<sup>b</sup>Systemic Physiological and Ecotoxicological Research (SPHERE), Department of Biology, University of Antwerp, Groenenborgerlaan 171, 2020 Antwerp, Belgium.

<sup>c</sup>Integrated Molecular Plant Physiology Research (IMPRES), Department of Biology, University of Antwerp, Groenenborgerlaan 171, 2020 Antwerp, Belgium.

<sup>d</sup>Botany and Microbiology Department, Faculty of Science, Beni-Suef University, 62521 Beni-Suef, Egypt

\*Corresponding author

Ana.lopezantia@uantwerpen.be

†Joint first authors

**Supplementary Information**

Number of pages: 16

Number of figures: 4

Number of tables: 12

## DETAILED DESCRIPTION OF THE METHODS

We provide below a more detailed description of some of the methods used in this study.

### **PFAAs analysis in plasma.**

A mixture of isotopically mass-labelled internal standards (ISTDs), comprising  $^{13}\text{C}_4$ -PFBA, [1,2- $^{13}\text{C}_2$ ]PFHxA, [1,2,3,4- $^{13}\text{C}_4$ ]PFOA, [1,2,3,4,5- $^{13}\text{C}_5$ ]PFNA, [1,2- $^{13}\text{C}_2$ ]PFDA, [1,2- $^{13}\text{C}_2$ ]PFUnDA, [1,2- $^{13}\text{C}_2$ ]PFDoDA,  $^{18}\text{O}_2$ -PFHxS and [1,2,3,4- $^{13}\text{C}_4$ ]PFOS, were purchased by Wellington Laboratories (Guelph, Canada). HPLC grade acetonitrile (ACN; Merck Chemicals, N.V./S.A. (Millipore), Overijse, Belgium) and water (VWR International, Leuven, Belgium) were used.

### *Sample extraction*

Egg content was transferred into a polypropylene (PP) tube and homogenized by repeatedly sonicating and vortex-mixing. Blood plasma (10  $\mu\text{L}$ ), or homogenized egg ( $\sim 0.4\text{g}$ ) samples were transferred into PP tubes. Hereafter, 80  $\mu\text{L}$  of the previously described ISTD mixture, containing 125  $\text{pg}/\mu\text{L}$  of each ISTD (in 50:50 ACN:HPLC grade water), and 10 mL ACN was added to each sample. After sonication (3x10 min), samples were left overnight on a shaking plate at room temperature. After centrifugation (4°C, 10 min, 2400 rpm, Eppendorf centrifuge 5804R) the supernatant was transferred into a 14 mL tube and loaded on HR-XAW columns that were preconditioned and equilibrated with 5 mL ACN and 5 mL Milli-Q (MQ) water, respectively. Samples were washed with 5 mL 25 mM ammonium acetate and 2 mL ACN. Finally, samples were eluted from the SPE columns using 2 x 1 mL 2% ammonium hydroxide in ACN. The eluent was completely dried using a rotational-vacuum-concentrator at 30°C (Eppendorf concentrator 5301, Hamburg, Germany), reconstituted with 200  $\mu\text{L}$  2% ammonium hydroxide in ACN and vortex-mixed for at least 1 minute. Prior to the analysis, samples were filtrated through an Ion Chromatography Acrodisc 13 mm Syringe Filter with 0.2  $\mu\text{m}$  Supor (PES) Membrane (VWR International, Leuven, Belgium) attached to a PP auto-injector vial.

### *UPLC-TQD analysis*

To separate PFAAs, an ACQUITY BEH C18 column (2.1 x 50 mm; 1.7  $\mu\text{m}$ , Waters, USA) was used. Mobile phases consisted of 0.1% formic acid in water (A) and 0.1% formic acid in ACN (B). Solvent gradients were 65% A to 0% A in 3.4 min and 65% A at 4.7 min. The injection volume was 10  $\mu\text{L}$  at a flow rate of 450  $\mu\text{L}/\text{min}$ , with a total run time of 6.7 min. An ACQUITY BEH C18

pre-column (2.1 x 30 mm; 1.7  $\mu$ m, Waters, USA) was inserted between the solvent mixer and injector, to retain any PFAAs contamination originating from the system. Identification and quantification of individual PFAAs was based on multiple reaction monitoring (MRM) of two diagnostic transitions per analyte or ISTD.

#### *Calibration*

A constant amount of ISTD was added to varying amounts of non-labelled standards, ACN and water, to construct calibration curves. A linear regression function with a highly significant linear fit for all target analytes (all  $p < 0.001$ ;  $R^2 > 0.98$ ) described the relationship between the ratio of unlabelled and labelled PFAA concentrations and the ratio of the area of the unlabelled and labelled PFAAs. With exception of PFPeA, PFHpA, PFTrDA, PFTeDA, PFBS and PFDS, which were all quantified using the ISTD of the compound closest in terms of functional group and size (individual PFAAs were quantified using their corresponding ISTD).

#### *Quality assurance*

The quality of the method was assured by regular analysis of procedural blanks (one per batch of 20 samples) and contained no contamination. The limit of quantification (LOQ) was determined, based on a signal-to-noise ratio of 10 and ranged from 1.1 to 8.2 pg/ $\mu$ L for all compounds with exception of PFHxS (129.2 pg/ $\mu$ L), PFOS (LOQ = 46.6 pg/ $\mu$ L) and PFPeA (52.4 pg/ $\mu$ L) and which had considerably higher LOQs due to high noise.

#### **Antioxidant and oxidative stress parameters measurement in red blood cells**

For the detection of molecular antioxidants in red blood cells: reduced glutathione (GSH) and oxidised glutathione (GSSG), high-performance liquid chromatography with electro-chemical detection by a reversed-phase HPLC of Shimadzu (Shimadzu, 's Hertogenbosch, The Netherlands) was used, following the protocol as described by Sinha et al. (2014). Approximately, 10 mg of RBC per sample were used. The ratio between GSH/ GSSG was used as an index of redox state with lower values indicating higher oxidative stress (Jones 2006).

Activity of antioxidant enzymes, superoxide dismutase (SOD), catalase (CAT) and glutathione peroxidase (GPX) were determined from haemolysates of red blood cells. Approximately, 10 mg of RBC were homogenized by MagNALyser (Roche, Vilvoorde, Belgium) in 250  $\mu$ l of extracting

buffer (pH 7.4; 1.15% KCl and 0.02 M EDTA in 0.01 M PBS). All measurements were scaled down for semi-high throughput using a micro-plate reader (Multiskan RC plate reader type 351; Synergy Mx, Biotek Instruments Inc., Vermont, USA). SOD activity was determined by measuring the inhibition of nitroblue tetrazolium (NBT) reduction at 560 nm ( $\epsilon_{530} = 12.8 \text{ mM}^{-1} \text{ cm}^{-1}$ ), following Dhindsa et al. (1981). CAT activity was measured following Aebi (1984), by monitoring the rate of decomposition of  $\text{H}_2\text{O}_2$  ( $\epsilon_{240} = 39.4 \text{ M}^{-1}\text{cm}^{-1}$ ). Activity of GPX was determined following Drotar et al. (1985) by measuring the decrease in NADPH absorbance measured at 340 nm and calculated from the  $6.22 \text{ mM}^{-1} \text{ cm}^{-1}$  extinction coefficient. A modified ferric ion reducing antioxidant power (FRAP) assay was used to estimate the total antioxidant capacity (TAC) (Benzie and Strain 1996). Homogenised red blood cells were mixed with the FRAP reagent, and the absorption was measured at 600 nm after 30 min. 6-Hydroxy-2,5,7,8-tetramethylchroman-2-carboxylic acid (Trolox) was used as the standard.

Finally, we measured protein carbonyls (marker of protein damage) in red blood cells as oxidative damage markers. We followed the procedure explained in the “Protein Carbonyl Colorimetric Assay Kit” by Cayman Chemical's (Ann Arbor, MI, USA; see also Levine et al. 1990) to measure protein carbonyl content after samples had been diluted with buffer extract to  $2 \text{ mg protein ml}^{-1}$ .

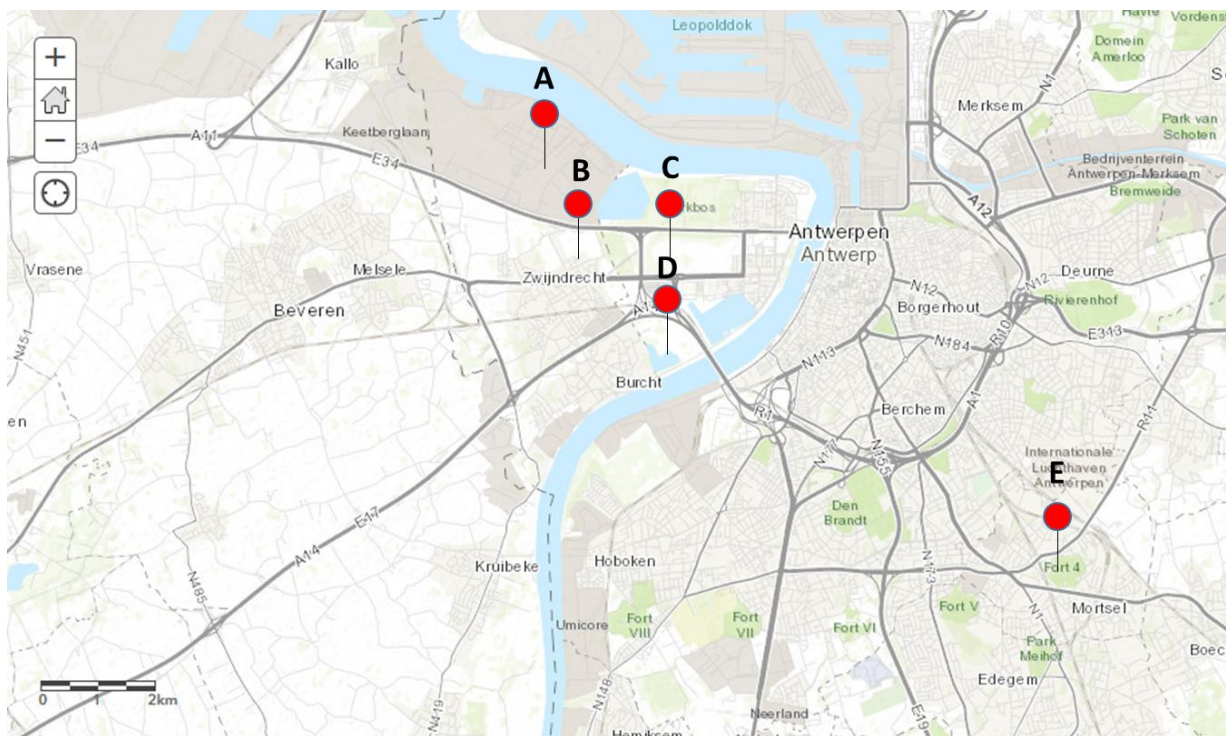

**Figure S1.** Overview of the different study sites located along a distance gradient of 11 km from an active fluorochemical plant in Antwerp (Belgium). A: Fluorochemical plant; B: Vlietbos; C: Rot; D: Burchtse Weel; E: Fort 4. (Map created using ArcGIS® software by Esri).

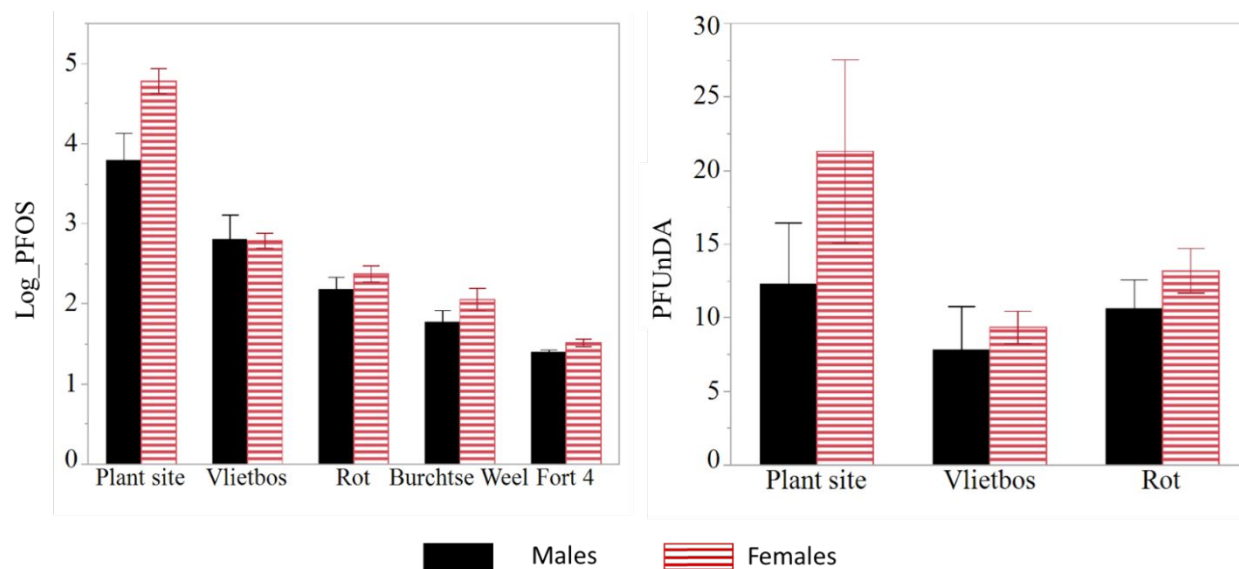

**Figure S2.** Mean concentrations (pg/μL) of PFUnDA and logPFOS ( $\pm$ SE) found in adult birds' plasma (temporal data were pooled together (adults from both the late winter and the spring)), at the five sampling sites, separated by sex. Sample sizes are (F/M): Plant site=16/8; Vlietbos=7/24; Rot=14/8; Burchtse Weel=12/11; Fort 4=12/19.

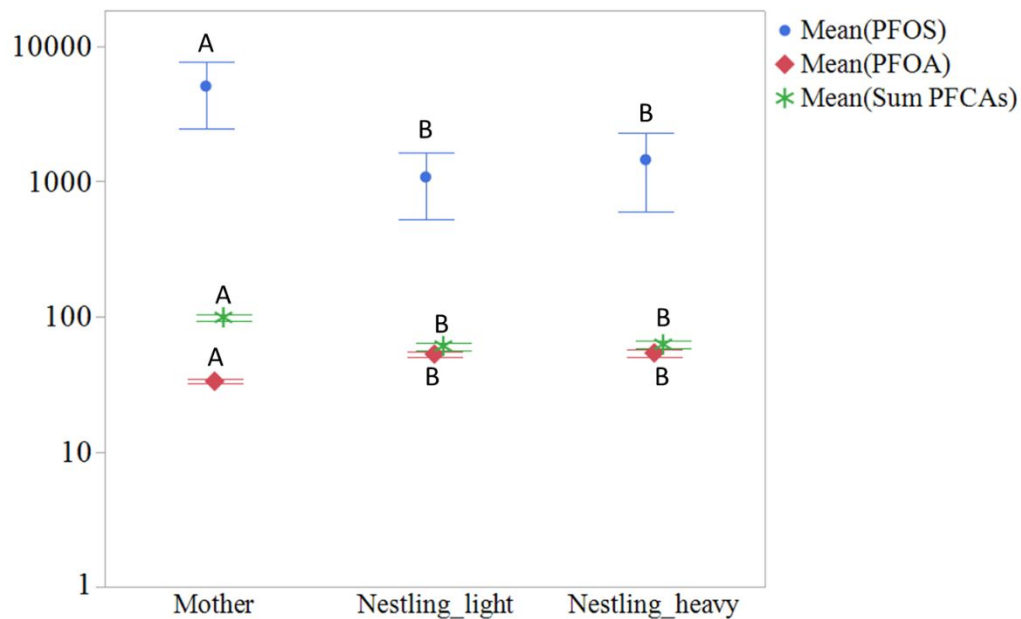

**Figure S3.** Mean concentrations (pg/μL ±SE) of PFOA, PFOS and ΣPFCAs found in the blood of the mother and the offspring (the lightest and the heaviest nestlings in the nest, n=40 nests). Different letters indicate significantly different concentrations between different sample types.

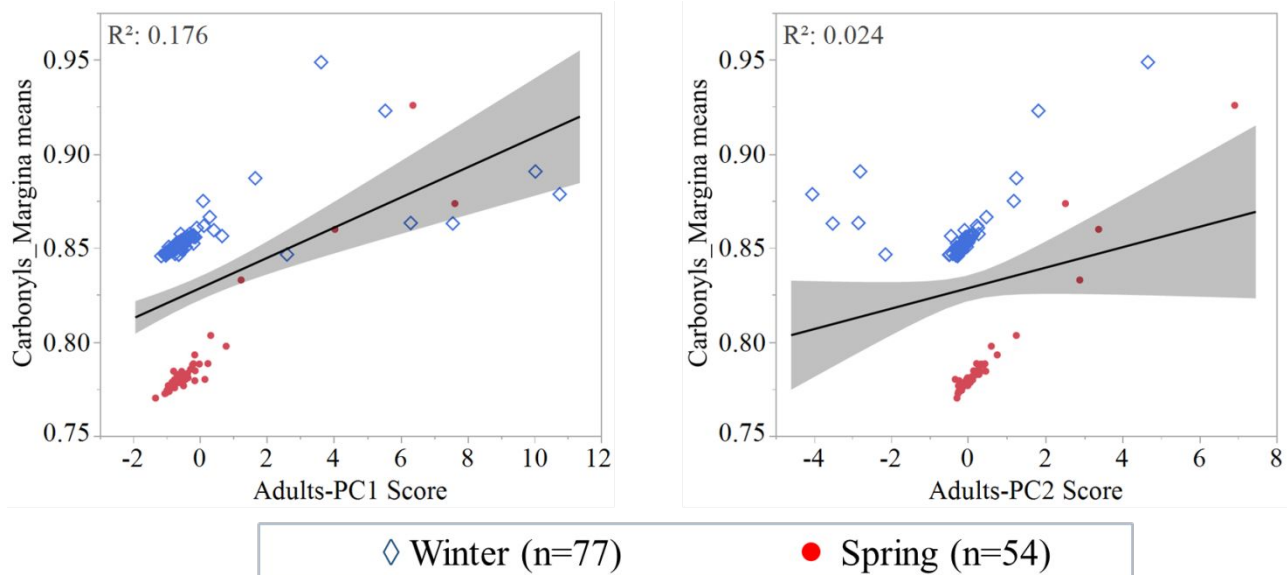

**Figure S4.** Relationship between Adults-PC1 and Adults-PC2 and protein carbonyl (marginal means as obtained in the mix model when considering season as a factor and ring number as random effect) content in blood of adult birds sampled in winter and spring. Regression lines are shown with 95% confidence bands shaded.

**Table S1.** Target PFAA compounds ( 11 perfluoroalkyl carboxylic acids and 4 perfluoroalkyl sulfonic acids), chemical formula and their acronyms ( the used abbreviations for PFAA compounds are according to Buck et al. 2011)

| Family                                                                        | Compound                      | Formula             | Acronym |
|-------------------------------------------------------------------------------|-------------------------------|---------------------|---------|
| <b>Perfluoroalkyl carboxylic acids</b><br>$C_nF_{2n+1}COOH$<br><b>(PFCAs)</b> | Perfluorobutanoic acid        | $C_3F_7COOH$        | PFBA    |
|                                                                               | Perfluoropentanoic acid       | $C_4F_9COOH$        | PFPeA   |
|                                                                               | Perfluorohexanoic acid        | $C_5F_{11}COOH$     | PFHxA   |
|                                                                               | Perfluoroheptanoic acid       | $C_6F_{13}COOH$     | PFHpA   |
|                                                                               | Perfluorooctanoic acid        | $C_7F_{15}COOH$     | PFOA    |
|                                                                               | Perfluorononanoic acid        | $C_8F_{17}COOH$     | PFNA    |
|                                                                               | Perfluorodecanoic acid        | $C_9F_{19}COOH$     | PFDA    |
|                                                                               | Perfluoroundecanoic acid      | $C_{10}F_{21}COOH$  | PFUnDA  |
|                                                                               | Perfluorododecanoic acid      | $C_{11}F_{23}COOH$  | PFDoDA  |
|                                                                               | Perfluorotridecanoic acid     | $C_{12}F_{25}COOH$  | PFTTrDA |
|                                                                               | Perfluorotetradecanoic acid   | $C_{13}F_{27}COOH$  | PTeDA   |
| <b>Perfluoroalkyl sulfonic acids</b><br>$C_nF_{2n}+SO_3H$<br><b>(PFsAs)</b>   | Perfluorobutane sulfonic acid | $C_4F_9SO_3H$       | PFBS    |
|                                                                               | Perfluorohexane sulfonic acid | $C_6F_{13}SO_3H$    | PFHxS   |
|                                                                               | Perfluorooctane sulfonic acid | $C_8F_{17}SO_3H$    | PFOS    |
|                                                                               | Perfluorodecane sulfonic acid | $C_{10}F_{21}SO_3H$ | PFDS    |

**Table S2.** Limits of quantification (LOQ: pg/μL), mean and median concentrations (pg/μL), range and detection frequencies (%) of most frequently found PFAA compounds (PFCAs; perfluoroalkyl carboxylic acids. PFSAs; perfluoroalkyl sulfonic acids) in plasma of adult great tits sampled at the five sampling sites. Different upper case letters indicate significantly different mean concentrations among locations. Different lower case letters indicate significantly different detection frequencies among locations. Temporal data were pooled together (adults from the late winter and the spring). \*For PFOA, concentration in the plant site was only significantly higher in winter (no differences in spring).

|                                  |        | PFCAs              |                 |             |                  |                   |             | PFSAs              |
|----------------------------------|--------|--------------------|-----------------|-------------|------------------|-------------------|-------------|--------------------|
|                                  |        | PFOA               | PFNA            | PFDA        | PFUnDA           | PFDoDA            | PFTTrDA     | PFOS               |
| <b>LOQ</b>                       |        | 2.6                | 4.1             | 5.5         | 6.4              | 1.8               | 1.4         | 46.6               |
| <b>Detection frequency</b>       |        | 99                 | 26.7            | 24.1        | 47.8             | 62.9              | 32.7        | 71.7               |
| <b>Plant site<br/>(n =24)</b>    | Median | 75.1               | 12.8            | 5.57        | 9.99             | 15.7              | 5.60        | 20168              |
|                                  | Mean   | 94.9 <sup>A*</sup> | 21.8            | 89.2        | 17.7             | 23.1 <sup>A</sup> | 8.54        | 43428 <sup>A</sup> |
|                                  | Range  | <LOQ -244          | <LOQ – 81.0     | <LOQ - 477  | <LOQ – 57.2      | <LOQ – 122        | <LOQ – 40.0 | <LOQ - 161333      |
|                                  | Freq   | 95                 | 70 <sup>a</sup> | 50          | 50 <sup>ab</sup> | 75                | 55          | 100 <sup>a</sup>   |
| <b>Vlietbos<br/>(n =31)</b>      | Median | 40.0               | <LOQ            | <LOQ        | 8.15             | 3.38              | <LOQ        | 488                |
|                                  | Mean   | 44.8 <sup>B</sup>  | <LOQ            | <LOQ        | 8.92             | 4.16 <sup>B</sup> | <LOQ        | 1780 <sup>B</sup>  |
|                                  | Range  | 25.5 – 94.7        | <LOQ - 23.9     | <LOQ - 19.1 | <LOQ - 24.5      | <LOQ – 17.4       | <LOQ - 3.17 | 65.4 - 21139       |
|                                  | Freq   | 100                | 17 <sup>b</sup> | 28          | 62 <sup>a</sup>  | 76                | 38          | 100 <sup>a</sup>   |
| <b>Rot<br/>(n=22)</b>            | Median | 41.1               | <LOQ            | <LOQ        | 10.3             | 3.44              | <LOQ        | 178                |
|                                  | Mean   | 41.5               | <LOQ            | <LOQ        | 11.2             | 3.46 <sup>B</sup> | <LOQ        | 260 <sup>BC</sup>  |
|                                  | Range  | 28.8 - 69.1        | <LOQ - 11.7     | <LOQ - 11.0 | <LOQ – 22.8      | <LOQ – 8.25       | <LOQ - 4.18 | <LOQ - 1182        |
|                                  | Freq   | 100                | 20 <sup>b</sup> | 20          | 70 <sup>a</sup>  | 70                | 35          | 84 <sup>ab</sup>   |
| <b>Burchtse Weel<br/>(n =23)</b> | Median | 40.2               | <LOQ            | <LOQ        | <LOQ             | <LOQ              | <LOQ        | 59.6               |
|                                  | Mean   | 47.1 <sup>B</sup>  | <LOQ            | <LOQ        | <LOQ             | <LOQ              | 1.56        | 118 <sup>D</sup>   |
|                                  | Range  | 18.4 - 104         | <LOQ - 8.36     | <LOQ - 20.4 | <LOQ - 22.1      | <LOQ - 9.15       | <LOQ - 9.95 | <LOQ - 657         |
|                                  | Freq   | 100                | 15 <sup>b</sup> | 15          | 32 <sup>b</sup>  | 45                | 25          | 60 <sup>b</sup>    |
| <b>Fort 4<br/>(n=31)</b>         | Median | 41.3               | <LOQ            | <LOQ        | <LOQ             | <LOQ              | <LOQ        | <LOQ               |
|                                  | Mean   | 44.0 <sup>B</sup>  | <LOQ            | <LOQ        | <LOQ             | <LOQ              | <LOQ        | <LOQ               |
|                                  | Range  | 7.63 - 75.4        | <LOQ - 12.2     | <LOQ - 10.5 | <LOQ - 27.4      | <LOQ - 9.87       | <LOQ - 6.20 | <LOQ - 91.22       |
|                                  | Freq   | 100                | 18 <sup>b</sup> | 11          | 26 <sup>b</sup>  | 48                | 15          | 25 <sup>c</sup>    |



**Table S3.** Limits of quantification (LOQ: pg/μL) and detection frequencies (%) of PFAA compounds rarely found (less than 20% of the samples above the LOQ) in plasma of adult great tits sampled at the five sampling sites.

|                      |      | PFCAs |       |       |        |
|----------------------|------|-------|-------|-------|--------|
|                      |      | PFBA  | PFPeA | PFHxA | PFTeDA |
| <b>LOQ</b>           |      | 6.5   | 52.4  | 8.2   | 1.3    |
| <b>Plant site</b>    | Freq | 12.5  | 0     | 0     | 8.3    |
| <b>Vlietbos</b>      | Freq | 0     | 22.6  | 9.7   | 3.2    |
| <b>Rot</b>           | Freq | 0     | 22.7  | 4.5   | 4.5    |
| <b>Burchtse Weel</b> | Freq | 0     | 4.3   | 0     | 4.3    |
| <b>Fort 4</b>        | Freq | 6.4   | 6.4   | 0     | 6.4    |

**Table S4.** Results of the Principal Component Analysis conducted on the PFAA compounds measured in great tits plasma; Adults (n=131), nestlings (n= 170). Variable loadings greater than 0.6 or lower than -0.6 are highlighted in bold.

|                    | Adults       |              | Nestlings    |
|--------------------|--------------|--------------|--------------|
|                    | PC1          | PC2          | PC1          |
| PFBA               |              |              | <b>0.738</b> |
| PFOA               | <b>0.758</b> | -0.136       | <b>0.856</b> |
| PFNA               | <b>0.841</b> | -0.419       |              |
| PFDA               | <b>0.858</b> | -0.355       |              |
| PFUnDA             | <b>0.756</b> | 0.185        |              |
| PFDODA             | <b>0.751</b> | 0.586        | <b>0.855</b> |
| PFTTrDA            | 0.555        | <b>0.763</b> |              |
| PFOS               | <b>0.933</b> | -0.260       | <b>0.950</b> |
| Variance explained |              |              |              |
| Proportion         | 61.91        | 19.26        | 72.76        |
| Cumulative         |              | 81.17        |              |

**Table S5.** Coefficient (r) and probability (p) of the correlations found between different PFAA compounds (those with detection frequency  $\geq 50\%$  in each site) at the five sampling sites in the plasma samples of the adults.

|                |                | Plant site<br>(n = 24) |                  | Vlietbos<br>(n = 31) |       | Rot<br>(n = 22) |                 | Burchtse Weel<br>(n = 23) |              | Fort 4<br>(n = 31) |   |
|----------------|----------------|------------------------|------------------|----------------------|-------|-----------------|-----------------|---------------------------|--------------|--------------------|---|
|                |                | r                      | p                | r                    | p     | r               | p               | r                         | p            | r                  | p |
| <b>PFOA</b>    | <b>PFNA</b>    | 0.83                   | <b>&lt;.0001</b> |                      |       |                 |                 |                           |              |                    |   |
|                | <b>PFDA</b>    | 0.55                   | <b>0.005</b>     |                      |       |                 |                 |                           |              |                    |   |
|                | <b>PFUnDA</b>  | 0.27                   | 0.197            | 0.03                 | 0.851 | 0.32            | 0.144           |                           |              |                    |   |
|                | <b>PFDoDA</b>  | 0.46                   | <b>0.027</b>     | -0.19                | 0.322 | 0.33            | 0.130           |                           |              |                    |   |
|                | <b>PFTTrDA</b> | 0.16                   | 0.451            |                      |       |                 |                 |                           |              |                    |   |
|                | <b>PFOS</b>    | 0.58                   | <b>0.003</b>     | -0.13                | 0.488 | 0.20            | 0.373           | -0.50                     | <b>0.015</b> |                    |   |
| <b>PFNA</b>    | <b>PFDA</b>    | 0.65                   | <b>0.001</b>     |                      |       |                 |                 |                           |              |                    |   |
|                | <b>PFUnDA</b>  | 0.49                   | <b>0.018</b>     |                      |       |                 |                 |                           |              |                    |   |
|                | <b>PFDoDA</b>  | 0.44                   | <b>0.041</b>     |                      |       |                 |                 |                           |              |                    |   |
|                | <b>PFTTrDA</b> | 0.16                   | 0.475            |                      |       |                 |                 |                           |              |                    |   |
|                | <b>PFOS</b>    | 0.84                   | <b>&lt;.0001</b> |                      |       |                 |                 |                           |              |                    |   |
| <b>PFDA</b>    | <b>PFUnDA</b>  | 0.49                   | <b>0.014</b>     |                      |       |                 |                 |                           |              |                    |   |
|                | <b>PFDoDA</b>  | 0.53                   | <b>0.009</b>     |                      |       |                 |                 |                           |              |                    |   |
|                | <b>PFTTrDA</b> | 0.25                   | 0.252            |                      |       |                 |                 |                           |              |                    |   |
|                | <b>PFOS</b>    | 0.74                   | <b>&lt;.0001</b> |                      |       |                 |                 |                           |              |                    |   |
| <b>PFUnDA</b>  | <b>PFDoDA</b>  | 0.60                   | <b>0.002</b>     | -0.21                | 0.266 | 0.66            | <b>&lt;.001</b> |                           |              |                    |   |
|                | <b>PFTTrDA</b> | 0.47                   | <b>0.022</b>     |                      |       |                 |                 |                           |              |                    |   |
|                | <b>PFOS</b>    | 0.55                   | <b>0.005</b>     | 0.05                 | 0.806 | 0.37            | 0.0880          |                           |              |                    |   |
| <b>PFDoDA</b>  | <b>PFTTrDA</b> | 0.81                   | <b>&lt;.0001</b> |                      |       |                 |                 |                           |              |                    |   |
|                | <b>PFOS</b>    | 0.70                   | <b>&lt;.001</b>  | -0.05                | 0.786 | 0.56            | <b>0.006</b>    |                           |              |                    |   |
| <b>PFTTrDA</b> | <b>PFOS</b>    | 0.50                   | <b>0.014</b>     |                      |       |                 |                 |                           |              |                    |   |

**Table S6.** Limits of quantification (LOQ: pg/ $\mu$ L), mean and median concentrations (pg/ $\mu$ L), range (pg/ $\mu$ L) and detection frequencies (%) of most frequently found PFAA compounds (PFCAs; perfluoroalkyl carboxylic acids. PFSAs; perfluoroalkyl sulfonic acids) in plasma of great tits nestlings (14 days old) at the five sampling sites. Different upper case letters indicate significantly different mean concentrations among locations. Different lower case letters indicate significantly different detection frequencies between locations.

|                                                     |        | PFCAs             |                   |                   | PFSAs              |
|-----------------------------------------------------|--------|-------------------|-------------------|-------------------|--------------------|
|                                                     |        | PFBA              | PFOA              | PFDoDA            | PFOS               |
| <b>LOQ</b>                                          |        | 6.5               | 2.6               | 1.8               | 46.6               |
| <b>Plant site</b><br>(n =38nestlings /14 nests)     | Median | 16.4              | 93.3              | 10.2              | 17137              |
|                                                     | Mean   | 24.1              | 139 <sup>A</sup>  | 12.2              | 14514 <sup>A</sup> |
|                                                     | Range  | <LOQ - 112        | 32.1 - 438.7      | <LOQ - 49.8       | 612 -35624         |
|                                                     | Freq   | 60.5 <sup>a</sup> | 100               | 80.5 <sup>a</sup> | 100 <sup>a</sup>   |
| <b>Vlietbos</b><br>(n =47nestlings /18 nests)       | Median | <LOQ              | 48.4              | <LOQ              | 123                |
|                                                     | Mean   | <LOQ              | 50.1 <sup>B</sup> | 1.9               | 464 <sup>B</sup>   |
|                                                     | Range  | <LOQ -10.8        | 20.2 - 81.0       | <LOQ -9.39        | <LOQ -3292         |
|                                                     | Freq   | 10.4 <sup>b</sup> | 100               | 19.1 <sup>b</sup> | 91.3 <sup>a</sup>  |
| <b>Rot</b><br>(n=22nestlings / 10 nests)            | Median |                   | 54.1              | <LOQ              | 47.3               |
|                                                     | Mean   |                   | 52.9 <sup>B</sup> | <LOQ              | 68.3 <sup>C</sup>  |
|                                                     | Range  | All <LOQ          | 27.8 - 83.2       | <LOQ - 7.74       | <LOQ - 198         |
|                                                     | Freq   | 0 <sup>c</sup>    | 100               | 30.4 <sup>b</sup> | 52.2 <sup>b</sup>  |
| <b>Burchtse Weel</b><br>(n =35nestlings / 14 nests) | Median | <LOQ              | 46.5              | <LOQ              | <LOQ               |
|                                                     | Mean   | <LOQ              | 49.1 <sup>B</sup> | <LOQ              | <LOQ               |
|                                                     | Range  | <LOQ - 7.16       | 23.9 - 83.4       | <LOQ - 7.58       | <LOD - 247         |
|                                                     | Freq   | 5.7 <sup>bc</sup> | 100               | 14.3 <sup>b</sup> | 28.6 <sup>b</sup>  |
| <b>Fort 4</b><br>(n=28nestlings /14 nests)          | Median | <LOQ              | 51.6              | <LOQ              | <LOQ               |
|                                                     | Mean   | <LOQ              | 50.3 <sup>B</sup> | <LOQ              | <LOQ               |
|                                                     | Range  | <LOQ - 8.36       | 26.2 - 72.9       | <LOQ - 10.9       | <LOQ - 138         |
|                                                     | Freq   | 17.9 <sup>b</sup> | 100               | 25 <sup>b</sup>   | 7.14 <sup>c</sup>  |

**Table S7.** Coefficient (r) and probability (p) of the correlations found between different PFAA compounds (those with detection frequency  $\geq 50\%$  in each site) at the five sampling sites in the plasma samples of the nestlings.

|        |        | Plant site<br>(n = 38) |                  | Vlietbos<br>(n = 47 ) |                 | Rot<br>(n = 22) |        | Burchtse Weel<br>(n = 35) |   | Fort 4<br>(n = 28) |   |
|--------|--------|------------------------|------------------|-----------------------|-----------------|-----------------|--------|---------------------------|---|--------------------|---|
|        |        | r                      | p                | r                     | p               | r               | p      | r                         | p | r                  | p |
| PFBA   | PFOA   | 0.38                   | <b>0.020</b>     |                       |                 |                 |        |                           |   |                    |   |
|        | PFDODA | 0.37                   | <b>0.030</b>     |                       |                 |                 |        |                           |   |                    |   |
|        | PFOS   | 0.62                   | <b>&lt;.0001</b> |                       |                 |                 |        |                           |   |                    |   |
| PFOA   | PFDODA | 0.71                   | <b>&lt;.0001</b> |                       |                 |                 |        |                           |   |                    |   |
|        | PFOS   | 0.67                   | <b>&lt;.0001</b> | 0.47                  | <b>&lt;.001</b> | 0.0984          | 0.6630 |                           |   |                    |   |
| PFDODA | PFOS   | 0.73                   | <b>&lt;.0001</b> |                       |                 |                 |        |                           |   |                    |   |

**Table S8.** Limits of quantification (LOQ: pg/ $\mu$ L) and detection frequencies (%) of PFCA compounds rarely found (detection frequency  $< 20\%$ ) in plasma of great tit nestlings at the five sampling sites.

|                                           |      | PFCAs |      |        |         |        |
|-------------------------------------------|------|-------|------|--------|---------|--------|
|                                           |      | PFNA  | PFDA | PFUnDA | PFTTrDA | PFTeDA |
| LOQ                                       |      | 4.1   | 5.5  | 6.4    | 1.4     | 1.1    |
| Plant site (n =38nestlings /14 nests)     | Freq | 39    | 10   | 0      | 21      | 5      |
| Vlietbos (n =47nestlings /18 nests)       | Freq | 0     | 4    | 4      | 2       | 2      |
| Rot (n=22nestlings / 10 nests)            | Freq | 0     | 0    | 4      | 0       | 0      |
| Burchtse Weel (n =35nestlings / 14 nests) | Freq | 0     | 6    | 3      | 3       | 0      |
| Fort 4 (n=28nestlings /14 nests)          | Freq | 4     | 7    | 11     | 4       | 0      |

**Table S9.**  $\Sigma$ PFAAs,  $\Sigma$ PFCAs, PFOA, PFDoDA and PFOS mean ( $\pm$  SE ) concentrations in mothers, eggs and both nestlings (the lightest and the heaviest in the nest; mean  $\pm$  SE) at the five sampling sites (n=40 nests)

|                                     |                | Location          |                |                 |                |                |
|-------------------------------------|----------------|-------------------|----------------|-----------------|----------------|----------------|
|                                     |                | Plant site        | Vlietbos       | Rot             | Burchtse Weel  | Fort 4         |
| <b>Mother</b><br>(pg/ $\mu$ L)      | $\Sigma$ PFAAs | 43902 $\pm$ 16891 | 1391 $\pm$ 323 | 530 $\pm$ 153   | 354 $\pm$ 60   | 130 $\pm$ 12   |
|                                     | $\Sigma$ PFCAs | 145 $\pm$ 22      | 102 $\pm$ 7.3  | 90.0 $\pm$ 3.5  | 77.4 $\pm$ 4.1 | 87.2 $\pm$ 8.0 |
|                                     | PFOA           | 44.8 $\pm$ 3.4    | 33.1 $\pm$ 1.6 | 36.3 $\pm$ 3.0  | 27.5 $\pm$ 2.3 | 30.2 $\pm$ 3.0 |
|                                     | PFDoDA         | 23.5 $\pm$ 10     | 3.6 $\pm$ 0.6  | 3.5 $\pm$ 0.4   | 5.0 $\pm$ 1.3  | 4.6 $\pm$ 1.0  |
|                                     | PFOS           | 43757 $\pm$ 16870 | 1289 $\pm$ 324 | 410 $\pm$ 156   | 276 $\pm$ 62   | 43 $\pm$ 8.0   |
| <b>Egg</b><br>(ng/g)                | $\Sigma$ PFAAs | 81032 $\pm$ 38056 | 908 $\pm$ 253  | 363 $\pm$ 104   | 89.8 $\pm$ 9.0 | 41.7 $\pm$ 8.1 |
|                                     | $\Sigma$ PFCAs | 171 $\pm$ 67      | 14.2 $\pm$ 3.1 | 9.7 $\pm$ 1.8   | 6.8 $\pm$ 1.1  | 9.5 $\pm$ 2.2  |
|                                     | PFOA           | 18.2 $\pm$ 2.1    | 1.3 $\pm$ 0.2  | 1.2 $\pm$ 0.2   | 1.1 $\pm$ 0.3  | 1.0 $\pm$ 0.1  |
|                                     | PFDoDA         | 57.5 $\pm$ 26     | <LOD           | 1.7 $\pm$ 0.3   | <LOD           | 2.0 $\pm$ 0.7  |
|                                     | PFOS           | 80231 $\pm$ 37684 | 890 $\pm$ 251  | 351 $\pm$ 104   | 80.0 $\pm$ 9.1 | 29.2 $\pm$ 6.0 |
| <b>Chick light</b><br>(pg/ $\mu$ L) | $\Sigma$ PFAAs | 8517 $\pm$ 3980   | 464 $\pm$ 208  | 128 $\pm$ 37    | 94 $\pm$ 8.7   | 90 $\pm$ 15    |
|                                     | $\Sigma$ PFCAs | 115 $\pm$ 12      | 55.6 $\pm$ 4.0 | 55.2 $\pm$ 8.2  | 50.7 $\pm$ 3.2 | 52.5 $\pm$ 4.8 |
|                                     | PFOA           | 88.0 $\pm$ 4.1    | 50.2 $\pm$ 3.8 | 49.2 $\pm$ 7.2  | 44.5 $\pm$ 3.0 | 48.0 $\pm$ 5.1 |
|                                     | PFDoDA         | 7.3 $\pm$ 3.7     | <LOD           | 2.8 $\pm$ 1.1   | <LOD           | <LOD           |
|                                     | PFOS           | 11203 $\pm$ 3997  | 409 $\pm$ 206  | 73 $\pm$ 42     | <LOD           | <LOD           |
| <b>Chick heavy</b><br>(pg/ $\mu$ L) | $\Sigma$ PFAAs | 12419 $\pm$ 6509  | 372 $\pm$ 146  | 84 $\pm$ 15     | 123 $\pm$ 22   | 82 $\pm$ 7.2   |
|                                     | $\Sigma$ PFCAs | 115 $\pm$ 27      | 54.7 $\pm$ 3.5 | 52.3 $\pm$ 10.4 | 62.3 $\pm$ 4.9 | 55.3 $\pm$ 6.4 |
|                                     | PFOA           | 85.2 $\pm$ 19     | 48.3 $\pm$ 3.2 | 45.9 $\pm$ 9.1  | 57.4 $\pm$ 4.8 | 49.2 $\pm$ 5.8 |
|                                     | PFDoDA         | 6.8 $\pm$ 3.0     | <LOD           | <LOD            | <LOD           | <LOD           |
|                                     | PFOS           | 16406 $\pm$ 7113  | 336 $\pm$ 151  | <LOD            | 60 $\pm$ 18    | <LOD           |

**Table S10.** Mean ( $\pm$  SE) values of body condition and oxidative stress biomarkers (in red blood cells) in adult great tits at the five sampling sites. Different letters indicate significant differences between locations at the  $p < 0.05$  level according to Tukey test results.

|                   | Location          |                   |                   |                   |                   |
|-------------------|-------------------|-------------------|-------------------|-------------------|-------------------|
|                   | Plant site        | Vlietbos          | Rot               | Burchtse Weel     | Fort 4            |
| Body condition    | 17.6 $\pm$ 0.3    | 17.0 $\pm$ 0.2    | 17.2 $\pm$ 0.2    | 17.7 $\pm$ 0.2    | 17.4 $\pm$ 0.2    |
| TAC               | 10.5 $\pm$ 0.5A   | 10.9 $\pm$ 0.5A   | 10.7 $\pm$ 0.33A  | 10.9 $\pm$ 0.5A   | 8.8 $\pm$ 0.5B    |
| GPX               | 0.29 $\pm$ 0.03BC | 0.38 $\pm$ 0.02AB | 0.30 $\pm$ 0.02BC | 0.46 $\pm$ 0.04A  | 0.27 $\pm$ 0.03C  |
| SOD               | 0.82 $\pm$ 0.09   | 0.81 $\pm$ 0.12   | 0.98 $\pm$ 0.29   | 0.83 $\pm$ 0.11   | 1.14 $\pm$ 0.12   |
| Protein carbonyls | 7.71 $\pm$ 0.21A  | 5.90 $\pm$ 0.22C  | 7.87 $\pm$ 0.16A  | 6.11 $\pm$ 0.28BC | 7.05 $\pm$ 0.29AB |
| CAT               | 13.2 $\pm$ 1.1    | 15.6 $\pm$ 1.2    | 14.6 $\pm$ 1.40   | 19.9 $\pm$ 2.2    | 12.7 $\pm$ 1.30   |
| GSH               | 1.25 $\pm$ 0.18AB | 0.80 $\pm$ 0.16B  | 1.36 $\pm$ 0.17A  | 1.37 $\pm$ 0.23AB | 0.76 $\pm$ 0.11AB |
| GSSG              | 0.57 $\pm$ 0.07A  | 0.99 $\pm$ 0.12B  | 0.74 $\pm$ 0.09AB | 1.19 $\pm$ 0.33AB | 0.55 $\pm$ 0.08A  |
| GSH/GSSG ratio    | 3.36 $\pm$ 1.08A  | 0.73 $\pm$ 0.13B  | 3.28 $\pm$ 0.87A  | 1.70 $\pm$ 0.52AB | 2.43 $\pm$ 0.55A  |

Body condition (Scaled mass index); TAC (Total antioxidant capacity ( $\mu$ mol trolox/g)); GPX (glutathione peroxidase ( $\mu$ mol NADPH/mg protein)); SOD (Superoxide dismutase (U/mg protein)); Protein carbonyls (nmol/mg protein); CAT (catalase ( $\mu$ mol H<sub>2</sub>O<sub>2</sub>/mg protein)); GSH (Reduced and total glutathione ( $\mu$ mol/g)); GSSG (oxidized glutathione ( $\mu$ mol/g)).

**Table S11.** Mean ( $\pm$  SE) values of body condition and oxidative stress biomarkers (in red blood cells) in nestlings at the five sampling sites. Different letters indicate significant differences between locations at the  $p < 0.05$  level according to Tukey test results.

|                   | Location          |                  |                   |                   |                   |
|-------------------|-------------------|------------------|-------------------|-------------------|-------------------|
|                   | Plant site        | Vlietbos         | Rot               | Burchtse Weel     | Fort 4            |
| Body condition    | 15.6 $\pm$ 0.3    | 16.6 $\pm$ 0.2   | 15.63 $\pm$ 0.4   | 15.9 $\pm$ 0.3    | 15.0 $\pm$ 0.3    |
| TAC               | 5.33 $\pm$ 0.60AB | 8.18 $\pm$ 0.65A | 3.87 $\pm$ 0.54B  | 6.06 $\pm$ 0.47AB | 7.74 $\pm$ 0.60A  |
| GPX               | 0.18 $\pm$ 0.01AB | 0.21 $\pm$ 0.01A | 0.14 $\pm$ 0.01B  | 0.17 $\pm$ 0.01AB | 0.19 $\pm$ 0.01AB |
| SOD               | 0.66 $\pm$ 0.05A  | 0.45 $\pm$ 0.03B | 0.54 $\pm$ 0.03AB | 0.53 $\pm$ 0.07AB | 0.68 $\pm$ 0.07A  |
| Protein carbonyls | 6.60 $\pm$ 0.29AB | 7.91 $\pm$ 0.28A | 5.84 $\pm$ 0.37B  | 7.39 $\pm$ 0.36A  | 6.81 $\pm$ 0.38AB |
| CAT               | 7.65 $\pm$ 0.64   | 7.64 $\pm$ 0.43  | 6.33 $\pm$ 0.54   | 6.59 $\pm$ 0.53   | 6.05 $\pm$ 0.65   |
| GSH               | 1.15 $\pm$ 0.11   | 1.23 $\pm$ 0.09  | 1.02 $\pm$ 0.15   | 1.37 $\pm$ 0.17   | 1.39 $\pm$ 0.11   |
| GSSG              | 1.05 $\pm$ 0.09   | 1.15 $\pm$ 0.09  | 0.84 $\pm$ 0.08   | 1.02 $\pm$ 0.13   | 0.98 $\pm$ 0.07   |
| GSH/GSSG ratio    | 1.37 $\pm$ 0.22   | 1.45 $\pm$ 0.18  | 1.75 $\pm$ 0.54   | 2.64 $\pm$ 0.80   | 1.57 $\pm$ 0.15   |

Body condition (Scaled mass index); TAC (Total antioxidant capacity ( $\mu$ mol trolox/g)); GPX (glutathione peroxidase ( $\mu$ mol NADPH/mg protein)); SOD (Superoxide dismutase (U/mg protein)); Protein carbonyls (nmol/mg protein); CAT (catalase ( $\mu$ mol H<sub>2</sub>O<sub>2</sub>/mg protein)); GSH (Reduced and total glutathione ( $\mu$ mol/g)); GSSG (oxidized glutathione ( $\mu$ mol/g)).

**Table S12.** PFAA concentration (range; pg/μL) measured in plasma of different bird species around the world.

| Species                  | Place                      | Year      | PFCAs |           |         |           |          |          |          |         | PFSA   |            | REF      |      |
|--------------------------|----------------------------|-----------|-------|-----------|---------|-----------|----------|----------|----------|---------|--------|------------|----------|------|
|                          |                            |           | PFBA  | PFOA      | PFNA    | PFDA      | PFUnDA   | PFDoDA   | PFTTrDA  | PFTeDA  | PFBS   | PFHxS      |          | PFOS |
| Great tit Adults         | Belgium                    | 2015      | <-133 | <-232     | <-81    | <-477     | <-57     | <-61     | <-25     | <-2.4   |        | <-161333   | Current  |      |
| Great tit nestlings      |                            |           | <-112 | 20-438    | <-19    | <-15      | <-25     | <-50     | <-12     | <-6.7   |        | <-35624    |          |      |
| Bald eagle               | USA                        | 90s       |       |           |         |           |          |          |          |         |        | 1-2570     | 1        |      |
| Albatrosses              | North Pacific Ocean        | 1992-1996 |       | 0.1-0.30  |         |           |          |          |          |         |        | 0.310-13.4 | 2        |      |
| †Carrion crow            | Japan                      | 2002      |       |           |         |           |          |          |          |         | <45    | 68-1200    | 3        |      |
| Glaucous gull            | Norwegian Arctic           | 2004      |       | 0.70-0.74 | 2.3-6.3 | 3.1-15    |          | 2.9-24   | 3.6-30   |         |        | 0.3-2.7    | 48-349   | 4    |
| *†Black-backed gull      | Norway                     | 2005      |       |           |         |           |          | 1.2±0.08 | 2.4±0.17 |         |        | 1.0±0.06   | 37±2.7   | 5    |
| †Griffon vulture         | Israel                     | 2007      |       | 1.4–3.5   |         |           |          |          |          |         |        | 2.2–7.4    | 6        |      |
| Tree swallow             | Minnesota                  | 2008-2009 |       | 2.1–3.5   | 1.8–7.6 | 3.4–13    |          | 0.7-4.3  |          |         |        | 4.5–19.2   | 75-190   | 7    |
| Bald eagle nestlings     | Midwestern USA             | 2006-2011 |       | <-15      | 0.3-160 | 0.1–85    | 1.3-110  | 0.04–33  | 0.13–63  | <-310   | <-4100 | <-47       | 6.6-4200 | 8    |
| Kittiwakes               | Svalbard                   | 2012      | <-78  | 0.03–0.12 | 0.8–3.0 | 1.3–2.8   |          | 1.5-4.0  | 4.5-29.7 |         |        | 0.01-0.22  | 6.8–14   | 9    |
| *Kittiwakes              | Svalbard                   | 2012-2014 |       |           | 1.2±0.1 | 2.2 ± 0.1 | 12± 0.6  | 2.5± 0.1 | 11 ± 1.4 |         |        |            | 11±0.6   | 10   |
| †Calonectris shearwaters | Mediterranean and Atlantic | 2014      |       |           |         |           | 0.9–9.3  | 0.2-3.8  | 0.1-2.5  |         |        |            | 3.2 - 53 | 11   |
| *Kittiwakes              | Svalbard                   | 2016      |       |           | 2.0±0.9 | 2.9±1.2   | 10.3±3.7 | 1.7±0.8  | 8.6±3.1  | 1.0±0.8 |        |            | 13±6.2   | 12   |

\*Mean concentrations ± standard error. † Measured in whole blood (concentrations expressed in plasma would be 2 to 5-fold higher (Kannan et al. 2001))

< Concentrations below the LOQ.

References (Table S12):

1. Giesy, J. P.; Kannan, K.. Global distribution of perfluorooctane sulfonate in wildlife. *Environ. Sci. Technol.* **2001**, *35*, 1339-1342.
2. Tao, L.; Kannan, K.; Kajiwara, N.; Costa, M. M.; Fillmann, G.; Takahashi, S.; Tanabe, S. Perfluorooctanesulfonate and related fluorochemicals in albatrosses, elephant seals, penguins, and polar skuas from the southern ocean. *Environ. Sci. Technol.* **2006**, *40*, 7642-7648.
3. Taniyasu, S.; Kannan, K.; Horii, Y.; Hanari, N.; Yamashita, N. A survey of perfluorooctane sulfonate and related perfluorinated organic compounds in water, fish, birds, and humans from Japan. *Environ. Sci. Technol.* **2003**, *37*, 2634-2639.
4. Verreault, J.; Houde, M.; Gabrielsen, G. W.; Berger, U.; Haukas, M.; Letcher, R. J.; Muir, D. C. G. Perfluorinated alkyl substances in plasma, liver, brain, and eggs of glaucous gulls (*Larus hyperboreus*) from the Norwegian Arctic. *Environ. Sci. Technol.* **2005**, *39*, 7439-7445.
5. Bustnes, J. O.; Erikstad, K. E.; Lorentsen, S.-H.; Herzke, D. Perfluorinated and chlorinated pollutants as predictors of demographic parameters in an endangered seabird. *Environ. Pollut.* **2008**, *156*, 417-424.
6. Shlosberg, A.; Rumbeiha, W. K.; Lublin, A.; Kannan, K. A database of avian blood spot examinations for exposure of wild birds to environmental toxicants: The DABSE biomonitoring project. *J. Environ. Monitor.* **2011**, *13*, 1547-1558.
7. Custer, C. M.; Custer, T. W.; Schoenfuss, H. L.; Poganski, B. H.; Solem, L. Exposure and effects of perfluoroalkyl compounds on tree swallows nesting at Lake Johanna in east central Minnesota, USA. *Reprod. Toxicol.* **2012**, *33*, 556-562.
8. Route, W. T.; Key, R. L.; Russell, R. E.; Lindstrom, A. B.; Strynar, M. J. Spatial and temporal patterns in concentrations of perfluorinated compounds in bald eagle nestlings in the upper Midwestern United States. *Environ. Sci. Technol.* **2014**, *48*, 6653-6660.
9. Tartu, S.; Gabrielsen, G. W.; Blévin, P.; Ellis, H.; Bustnes, J. O.; Herzke, D.; Chastel, O. . Endocrine and fitness correlates of long-chain perfluorinated carboxylates exposure in arctic breeding black-legged kittiwakes. *Environ. Sci. Technol.* **2014**, *48*, 13504-13510.
10. Blevin, P.; Angelier, F.; Tartu, S.; Bustamante, P.; Herzke, D.; Moe, B.; Bech, C.; Gabrielsen, G. W.; Bustnes, J.O.; Chastel, O. Perfluorinated substances and telomeres in an Arctic seabird: Cross-sectional and longitudinal approaches. *Environ. Pollut.* **2017**, *230*, 360-367.



11. Escoruela, J.; Garreta, E.; Ramos, R.; González-Solís, J.; Lacorte, S. Occurrence of Per- and Polyfluoroalkyl substances in *Calonectris* shearwaters breeding along the Mediterranean and Atlantic colonies. *Mar. Pollut. Bull.* **2018**, *131*, 335-340.
12. Costantini, D.; Blévin, P.; Herzke, D.; Moe, B.; Gabrielsen, G. W.; Bustnes, J. O.; Chastel, O. Higher plasma oxidative damage and lower plasma antioxidant defences in an Arctic seabird exposed to longer perfluoroalkyl acids. *Environ. Res.*, **2019**, *168*, 278-285. doi:<https://doi.org/10.1016/j.envres.2018.10.003>

The map in Figure S1 was created using ArcGIS® software by Esri. ArcGIS® and ArcMap™ are the intellectual property of Esri and are used herein under license. Copyright © Esri. All rights reserved. For more information about Esri® software, please visit [www.esri.com](http://www.esri.com).
